# Supplementary material
Source: PubMed Central journal article supplement (PMC7355019)
Supplement: pnas.2006343117.sapp.pdf [file pnas.2006343117.sapp.pdf]

## Supporting Information

### **PPAR $\alpha$ exacerbates necroptosis leading to increased mortality in post-influenza bacterial super-infection.**

Vincent C. Tam<sup>5</sup>, Rosa Suen<sup>1</sup>, Piper M. Treuting<sup>2</sup>, Aaron Armando<sup>3</sup>, Ronald Lucarelli<sup>5</sup>, Norma Gorrochotegui-Escalante<sup>5</sup>, Alan Diercks<sup>1</sup>, Oswald Quehenberger<sup>4</sup>, Edward A. Dennis<sup>3</sup>, Alan Aderem<sup>1,6</sup>, Elizabeth S. Gold<sup>1,6,\*</sup>

**Author Affiliations:**<sup>1</sup>Seattle Children's Research Institute, 307 Westlake Ave. N. Suite 500, Seattle, WA 98109, USA,

<sup>2</sup>Department of Comparative Medicine, University of Washington, Seattle, WA 98195,

<sup>3</sup>Departments of Chemistry and Biochemistry and Pharmacology, School of Medicine, University of California, San Diego, La Jolla, CA 92093,

<sup>4</sup>Department of Medicine, School of Medicine, University of California, San Diego, La Jolla, CA 92093

<sup>5</sup>Department of Microbiology and Immunology, Temple University, Philadelphia, PA 19140

<sup>6</sup>Contributed equally

**Corresponding Author:** \* Correspondence: [elizabeth.gold@seattlechildrens.org](mailto:elizabeth.gold@seattlechildrens.org)

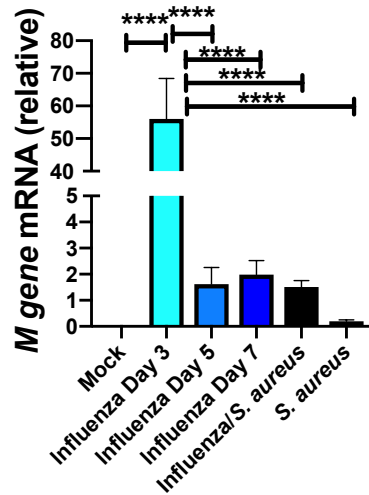

**Figure S1. Viral load in influenza-infected mice.** Bar graph depicts transcript levels of the influenza M-gene relative to EF1 $\alpha$  as measured by RT-PCR from total BAL cells isolated from wild-type C57BL/6 mice that were mock infected, influenza infected, influenza/*S. aureus* infected (measured 4 hours after *S. aureus* infection), or *S. aureus* infected (measured 4 hours after *S. aureus* infection). Statistical significance was measured by One-way ANOVA (\*\*\*\*  $p < 0.0001$ ).

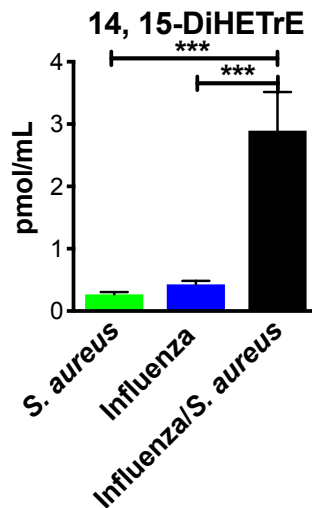

**Figure S2. Increased production of 14,15-DiHETrE during *S. aureus* and influenza/*S. aureus* super-infection.** Mice were left uninfected or infected with influenza for 7 days then infected with *S. aureus*. BAL was extracted 4 hours after *S. aureus* infection (or 7 days following influenza infection alone) and analyzed by LC/MS. Bar graph depicts the mean with SEM as error bars. Statistical significance was determined by unpaired Student's T-test (\*\*\*  $p < 0.001$ ) Data are representative of two independent experiments with 7-10 mice/condition.

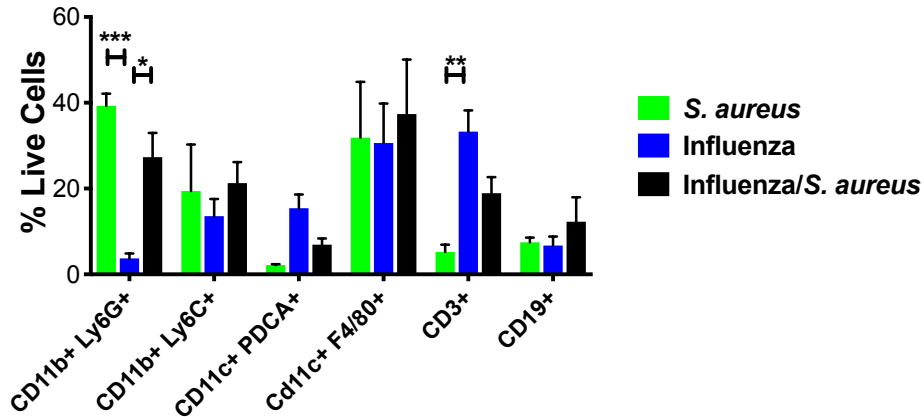

**Figure S3. Cellularity in BAL during *S. aureus* infection, influenza infection or influenza/*S. aureus* super-infection.** Neutrophils (CD11b+ Ly6G+), inflammatory monocytes (CD11b+, Ly6C+), DC (CD11c+ PDCA+), alveolar macrophages (CD11c+ F4.80+), T cells (CD3+), and B cells (CD19+) were enumerated by cytometry. 2-way ANOVA was performed to determine statistical significance (\* P<0.05; \*\* P<0.01; \*\*\* P<0.001). Data are representative of two independent experiments with three mice/condition.

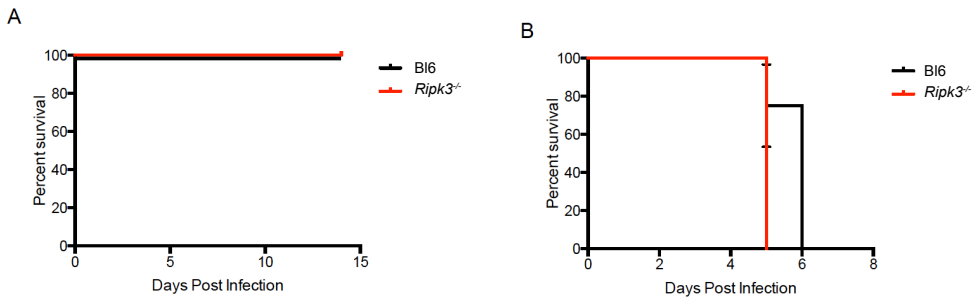

**Figure S4. Mortality from influenza infection in wild-type and *Ripk3*<sup>-/-</sup> mice.** (A) Survival curve of wild-type C57BL/6 (Black) or *Ripk3*<sup>-/-</sup> mice (Red) infected with 100 PFU of influenza (PR8). (B) Survival curve of wild-type C57BL/6 (Black) or *Ripk3*<sup>-/-</sup> mice (Red) infected with 2x10<sup>5</sup> PFU of influenza (PR8).

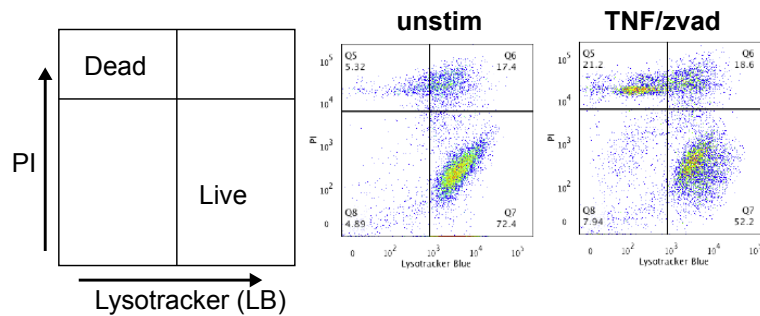

**Figure S5. Assessment of the dead/live cell ratio by flow cytometry.** Hox-derived macrophages from C57BL/6 mice were mock treated or treated with TNF and zvad for 16 hours, stained with propidium iodide (PI) and lysotracker blue (LB), and analyzed by flow cytometry. Dead cells are PI+ LB- and live cells are PI- LB+.
